# Supplementary material for: Prevalence of Vaginal HPV Infection Among Adolescent Girls in Jos, North-Central Nigeria
Source: Research Square preprint supplement (doi:10.21203/rs.3.rs-749817/v1), 2021-08-05
Supplement: Supplementary file 1 [file 138cc2c205dc7fab24934f9a.pdf]

Table 1: Characteristics of the study population

| Characteristic                           | Frequency | Percent | Mean( $\pm$ SD) | Min/Max |
|------------------------------------------|-----------|---------|-----------------|---------|
| <b>Age (Years)</b>                       |           |         | 14.9(2,34)      | 9/20    |
| 9-12                                     | 40        | 19.5    |                 |         |
| 13-16                                    | 115       | 56.1    |                 |         |
| 17-20                                    | 50        | 24.4    |                 |         |
| <b>Type of school</b>                    |           |         |                 |         |
| Public                                   | 104       | 50.7    |                 |         |
| Private                                  | 101       | 49.3    |                 |         |
| <b>Socio-economic status</b>             |           |         |                 |         |
| <b>Low</b>                               | 83        | 40.5    |                 |         |
| <b>Middle</b>                            | 81        | 39.5    |                 |         |
| <b>High</b>                              | 41        | 20.0    |                 |         |
| <b>Menarche</b>                          |           |         |                 |         |
| No                                       | 60        | 29.3    |                 |         |
| Yes                                      | 145       | 70.7    |                 |         |
| <b>Ever had sex</b>                      |           |         |                 |         |
| No                                       | 186       | 90.7    |                 |         |
| Yes                                      | 19        | 9.3     |                 |         |
| <b>Age at first time of sex (Years)</b>  |           |         | 13.3(3.58)      | 6/18    |
| <10                                      | 3         | 15.8    |                 |         |
| 10-12                                    | 5         | 26.3    |                 |         |
| 13-15                                    | 3         | 15.8    |                 |         |
| 16-18                                    | 8         | 42.1    |                 |         |
| <b>Last time of sexual contact</b>       |           |         |                 |         |
| < 1 month                                |           |         |                 |         |
| 1-5 months                               |           |         |                 |         |
| 6-12 months                              |           |         |                 |         |
| 1-5 years                                |           |         |                 |         |
| > 5 years                                |           |         |                 |         |
| <b>Number of sexual partners (Years)</b> |           |         | 0.1(048)        | 0/4     |
| 0                                        | 186       | 90.7    |                 |         |
| 1-2                                      | 17        | 8.3     |                 |         |
| 3-4                                      | 2         | 1.0     |                 |         |
| <b>Age of sexual Partner</b>             |           |         |                 |         |
| 17                                       | 1         | 5.3     |                 |         |
| 20                                       | 1         | 5.3     |                 |         |
| 21                                       | 1         | 5.3     |                 |         |
| 23                                       | 2         | 10.5    |                 |         |
| 24                                       | 1         | 5.3     |                 |         |
| 25                                       | 2         | 10.5    |                 |         |
| No response                              | 11        | 57.9    |                 |         |
| <b>Forced Sex</b>                        |           |         |                 |         |
| No                                       | 8         | 42.1    |                 |         |
| Yes                                      | 11        | 57.9    |                 |         |
| <b>Partner marital status</b>            |           |         |                 |         |
| Single                                   | 16        | 84.2    |                 |         |

|                                  |     |      |           |         |
|----------------------------------|-----|------|-----------|---------|
| Don't know                       | 1   | 5.2  |           |         |
| No response                      | 2   | 10.5 |           |         |
| <b>Masturbation</b>              |     |      |           |         |
| No                               | 198 | 96.6 |           |         |
| Yes                              | 7   | 3.4  |           |         |
| <b>Use toys for masturbation</b> |     |      |           |         |
| No                               | 6   | 85.7 |           |         |
| Yes                              | 1   | 14.3 |           |         |
| <b>Condom use</b>                |     |      |           |         |
| Always                           | 2   | 10.5 |           |         |
| Most of the time                 | 1   | 5.3  |           |         |
| Never                            | 13  | 68.4 |           |         |
| Sometimes                        | 3   | 15.3 |           |         |
| <b>Douching</b>                  |     | 83.4 |           |         |
| No                               | 171 | 16.6 |           |         |
| Yes                              | 34  |      |           |         |
| <b>Vaginal pH</b>                |     |      | 4.8(0.47) | 3.7/6.1 |
| <4.5                             | 7   | 3.5  |           |         |
| 4.5                              | 102 | 50.8 |           |         |
| >4.5                             | 92  | 45.8 |           |         |
| <b>Discussed sex with father</b> |     |      |           |         |
| No                               | 151 | 86.3 |           |         |
| Yes                              | 24  | 13.7 |           |         |
| <b>Discussed sex with mother</b> |     |      |           |         |
| No                               | 81  | 42.0 |           |         |
| Yes                              | 112 | 58.0 |           |         |
| <b>Discussed sex with others</b> |     |      |           |         |
| No                               | 56  | 27.3 |           |         |
| Yes                              | 149 | 72.7 |           |         |
| <b>Who discussed sex with</b>    |     |      |           |         |
| Aunt                             | 38  | 25.5 |           |         |
| Friend                           | 55  | 36.9 |           |         |
| Grandma                          | 7   | 4.7  |           |         |
| Health care practitioner         | 1   | 0.7  |           |         |
| Neighbour                        | 2   | 1.3  |           |         |
| Sister                           | 28  | 18.8 |           |         |
| Teacher                          | 16  | 10.7 |           |         |
| Guardian                         | 1   | 0.7  |           |         |
| Classmate                        | 1   | 0.7  |           |         |
| <b>Heard of HPV</b>              |     |      |           |         |
| No                               | 200 | 97.6 |           |         |
| Yes                              | 5   | 2.4  |           |         |
| <b>Heard of HPV vaccine</b>      |     |      |           |         |
| No                               | 200 | 97.6 |           |         |
| Yes                              | 5   | 2.4  |           |         |
